# Supplementary material for: Modello predittivo di policy per una migliore gestione della broncopneumopatia cronica ostruttiva: implicazioni economico-organizzative nel contesto sanitario italiano
Source: PubMed Central journal article supplement — Glob Reg Health Technol Assess. 2024 Nov 20;11:223–30. [Article in Italian] doi: 10.33393/grhta.2024.3114 (PMC11580476; doi:10.33393/grhta.2024.3114), 2024-11-20
Supplement: Supplementary_material.pdf [file Supplementary_material.pdf]

## Materiali supplementari

Tabella S1 - Probabilità di transizione dallo studio Soriano J. B. et al. [15]

| Anno 0   |          |          |          |          |
|----------|----------|----------|----------|----------|
| Da/a     | Stadio A | Stadio B | Stadio C | Stadio D |
| Stadio A | 38%      | -        | -        | -        |
| Stadio B | -        | 38%      | -        | -        |
| Stadio C | -        | -        | 8%       | -        |
| Stadio D | -        | -        | -        | 16%      |
| Anno 1   |          |          |          |          |
| Da/a     | Stadio A | Stadio B | Stadio C | Stadio D |
| Stadio A | 72%      | 19%      | 6%       | 3%       |
| Stadio B | 32%      | 50%      | 5%       | 13%      |
| Stadio C | 58%      | 20%      | 16%      | 6%       |
| Stadio D | 23%      | 38%      | 6%       | 33%      |
| Anno 2   |          |          |          |          |
| Da/a     | Stadio A | Stadio B | Stadio C | Stadio D |
| Stadio A | 68%      | 23%      | 4%       | 5%       |
| Stadio B | 31%      | 52%      | 5%       | 12%      |
| Stadio C | 44%      | 17%      | 29%      | 10%      |
| Stadio D | 27%      | 43%      | 7%       | 23%      |
| Anno 3   |          |          |          |          |
| Da/a     | Stadio A | Stadio B | Stadio C | Stadio D |
| Stadio A | 76%      | 18%      | 4%       | 2%       |
| Stadio B | 28%      | 51%      | 6%       | 15%      |
| Stadio C | 53%      | 21%      | 21%      | 5%       |
| Stadio D | 22%      | 36%      | 12%      | 30%      |
| Anno 4   |          |          |          |          |
| Da/a     | Stadio A | Stadio B | Stadio C | Stadio D |
| Stadio A | 68%      | 21%      | 6%       | 5%       |
| Stadio B | 23%      | 66%      | 0%       | 11%      |
| Stadio C | 35%      | 32%      | 21%      | 12%      |
| Stadio D | 13%      | 39%      | 5%       | 43%      |

Tabella S2 - Input diretti sanitari Scenario "AS IS" [16-18]

| Data input                                                                        | Stadio A | Stadio B | Stadio E |
|-----------------------------------------------------------------------------------|----------|----------|----------|
| Numero medio di visite in ambulatorio (n. eventi/anno)                            | 1.93     | 2.52     | 3.76     |
| Esami del sangue, (n. eventi/anno)                                                | 1.00     | 1.00     | 2.00     |
| Radiografia (RX) torace, (n. eventi/anno)                                         | 1.00     | 1.00     | 1.00     |
| Emogasanalisi (EGA), (n. eventi/anno)                                             | 0.00     | 0.00     | 1.00     |
| Numero medio di ricoveri ospedalieri (n. eventi/anno)                             | 0.35     | 0.41     | 0.63     |
| Pazienti con ≥1 ricovero ospedaliero (% pazienti/anno)                            | 11.70%   | 16.40%   | 78.10%   |
| Pazienti con riammissione a 30 giorni (% pazienti/anno)                           | 23.10%   | 6.70%    | 10.10%   |
| Pazienti con riammissione a 90 giorni (% pazienti/anno)                           | 33.30%   | 9.60%    | 23.20%   |
| Numero medio di accessi al PS (n. eventi/anno)                                    | 0.09     | 0.10     | 0.35     |
| Esacerbazioni moderate che richiedono accesso al PS, (n. eventi/anno)             | 0.09     | 0.10     | 0.35     |
| Esacerbazioni moderate che richiedono trattamento farmacologico, (n. eventi/anno) | 0.41     | 0.40     | 2.15     |

**Tabella S3** - Percentuale di utilizzo delle principali strategie terapeutiche utilizzate per la gestione della BPCO nello Scenario "AS IS" [16]

| Strategie terapeutiche                                                                                                                         | Utilizzo (%)  |               |               |
|------------------------------------------------------------------------------------------------------------------------------------------------|---------------|---------------|---------------|
|                                                                                                                                                | Stadio A      | Stadio B      | Stadio E      |
| <b>Adrenergici in associazione con Corticosteroidi (ICS/LABA)</b>                                                                              | 16.20%        | 19.75%        | 11.63%        |
| <b>Adrenergici in associazione con Anticolinergici (LABA/LAMA)</b>                                                                             | 19.01%        | 11.76%        | 16.63%        |
| <b>Anticolinergici (LAMA)</b>                                                                                                                  | 30.99%        | 20.59%        | 15.02%        |
| <b>Triplici terapie (ICS/LABA/LAMA)*</b>                                                                                                       | <b>14.08%</b> | <b>34.03%</b> | <b>40.94%</b> |
| - <b>Adrenergici in associazione con Anticolinergici ivi comprese triplici associazioni con corticosteroidi (ICS/LABA/LAMA) fissa</b>          | 14.34%        | 14.34%        | 14.34%        |
| - <b>Adrenergici in associazione con Anticolinergici ivi comprese triplici associazioni con corticosteroidi (ICS/LABA/LAMA) estemporanea**</b> | 85.66%        | 85.66%        | 85.66%        |
| • <b>ICS/LABA + LAMA**</b>                                                                                                                     | 95.00%        | 95.00%        | 95.00%        |
| • <b>ICS + LABA/LAMA**</b>                                                                                                                     | 5.00%         | 5.00%         | 5.00%         |
| <b>Agonisti selettivi del recettore beta2 adrenergico (LABA)</b>                                                                               | 4.23%         | 2.94%         | 2.14%         |
| <b>Altre terapie</b>                                                                                                                           | 4.93%         | 2.94%         | 2.02%         |
| <b>Nessuna terapia</b>                                                                                                                         | 10.56%        | 7.99%         | 11.62%        |

\*Le triplici terapie ricomprendono al loro interno sia la formulazione "fissa", ovvero a singolo inalatore, che la formulazione "estemporanea".

\*\*Per la formulazione estemporanea si è previsto un utilizzo del 95% della combinazione "ICS/LABA + LAMA" e del 5% della combinazione "ICS +LABA/LAMA".

**Tabella S4** - Policy 1 – Risultati analisi di sensibilità deterministica ad una via (DSA-One way)

| Aderenza terapeutica | Impatto complessivo |
|----------------------|---------------------|
| 19%                  | 5,056,746.30 €      |
| <b>19.5%</b>         | - €                 |
| 25%                  | - 55,624,209.35 €   |
| 30%                  | - 106,191,672.39 €  |
| 35%                  | - 156,759,135.44 €  |
| 40%                  | - 207,326,598.48 €  |
| 45%                  | - 257,894,061.52 €  |
| 50%                  | - 308,461,524.57 €  |
| 55%                  | - 359,028,987.61 €  |
| 60%                  | - 409,596,450.66 €  |

**Tabella S5** - Policy 2 – Risultati analisi di sensibilità deterministica ad una via (DSA-One way)

| <b>Market share</b> | <b>Impatto complessivo</b> |
|---------------------|----------------------------|
| 10%                 | - 10,857,560.38 €          |
| <b>14.34%</b>       | - €                        |
| 25%                 | - 26,668,569.96 €          |
| 35%                 | - 51,685,990.19 €          |
| 65%                 | - 89,212,120.53 €          |
| 75%                 | - 126,738,250.87 €         |
| 80%                 | - 151,755,671.10 €         |
| 85%                 | - 164,264,381.21 €         |
| 90%                 | - 176,773,091.32 €         |
| 100%                | - 189,281,801.44 €         |

**Tabella S6** - Policy 3 – Risultati analisi di sensibilità deterministica ad una via (DSA-One way)

| <b>Ritardo di accesso alla triplice terapia</b> | <b>Impatto complessivo</b> |
|-------------------------------------------------|----------------------------|
| <i>3 month delay</i>                            | - 175,182,121.34 €         |
| <i>6 month delay</i>                            | - 116,788,080.90 €         |
| <i>9 month delay</i>                            | - 58,394,040.45 €          |
| <b>12 month delay</b>                           | - €                        |
